# Supplementary material for: USP11 controls R-loops by regulating senataxin proteostasis
Source: PubMed Central journal article supplement (PMC8443744; doi:10.1038/s41467-021-25459-w), 2021-09-15
Supplement: 41467_2021_25459_MOESM1_ESM.pdf [file 41467_2021_25459_MOESM1_ESM.pdf]

# Supplementary Figure 1

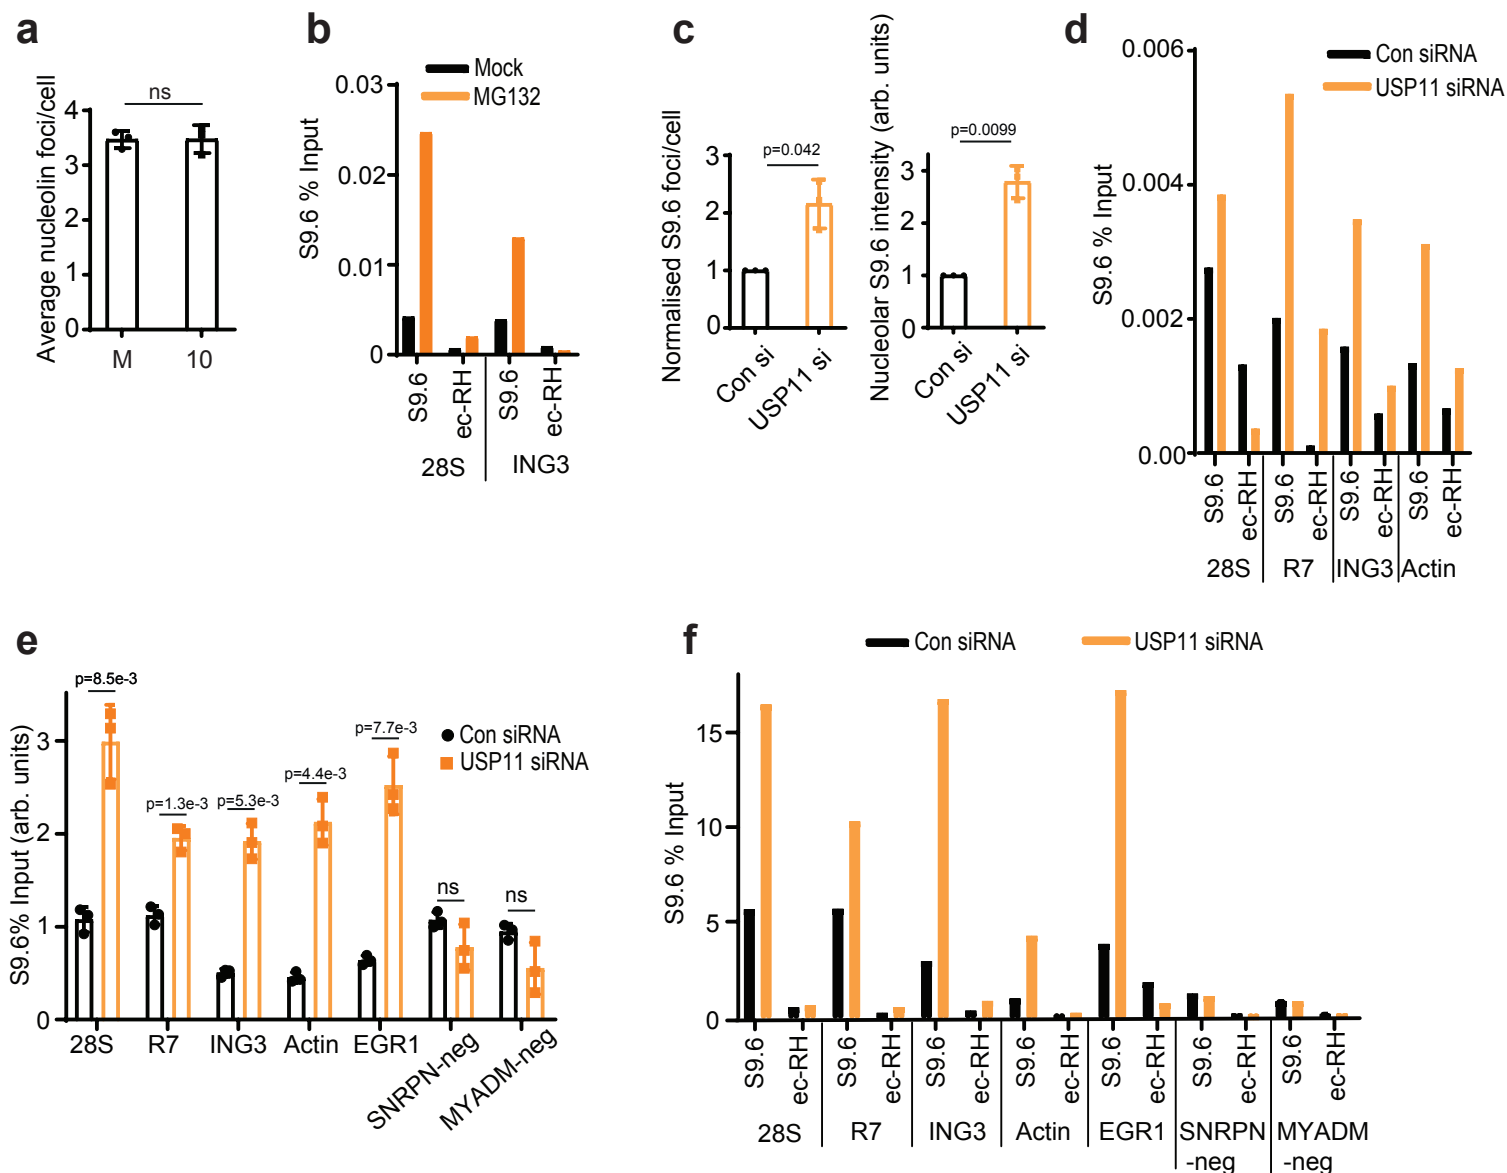

Supplementary Fig. 1. Dysregulation of ubiquitin-proteasome pathway results in increased R-loops.

a) MRC-5 cells were treated with DMSO (M) or 25 $\mu$ M CPT (10) for 10min and immediately harvested for nucleolin immunofluorescence. Data are the average  $\pm$  SD from 3 biological repeats, each containing at least 100 cells. The average number of nucleoli foci/cell was calculated. ns;  $p > 0.05$ , two-tailed Student's t-test.

b) Raw data from a representative repeat of DRIP-qPCR related to Fig. 1f. HEK-293 cells were incubated with mock (DMSO) or 25 $\mu$ M MG132 followed by DNA/RNA immunoprecipitation using S9.6 antibodies. Quantitative PCR was conducted using primers targeting nucleolar (28S) and nuclear (ING3) loci. *In vitro*, on-bead ec-RNase H (ec-RH) treatment served as a signal validation control.

c) U2-OS cells were transfected with USP11 or Control siRNA (Con si) and examined for R-loops using S9.6/nucleolin immunostaining. Data are the average  $\pm$  SD from 3 biological repeats, each containing at least 100 cells and presented as average number of S9.6 foci/cell (left panel) and mean S9.6 nucleolar intensity (right panel). Two-tailed Student's t-test.

d) Raw data from a single biological repeat of DRIP-qPCR related to Fig. 2c. Lysates from Control (Con si) and USP11 depleted cells (USP11si) were subjected to DNA/RNA immunoprecipitation (DRIP) using S9.6 antibodies. Quantitative PCR was conducted using primers targeting nucleolar (28S and R7) and nuclear (ING3 and *actin*) loci. *In vitro*, on-bead ec-RNase H (ec-RH) treatment served as a signal validation control.

e, f) Lysates from Control (Con siRNA) and USP11 depleted cells (USP11 siRNA) were subjected to a more recently published DNA/RNA immunoprecipitation (DRIP) protocol using S9.6 antibodies<sup>36</sup>. Quantitative PCR was conducted using primers targeting nucleolar (28S and R7) and nuclear (ING3, *actin*, *EGR1*, *SNRPN-neg*, *MYADM-neg*) loci. *SNRPN-neg* and *MYADM-neg* loci are negative controls. *In vitro*, on-bead ec-RNase H (ec-RH) treatment served as a signal validation control. Pooled repeats ( e ) and raw % input values from a representative experiment are shown ( f ), and data represent the average  $\pm$  SD from 3 biological repeats. ns;  $p > 0.05$ , two-tailed Student's t-test.

# Supplementary Figure 2

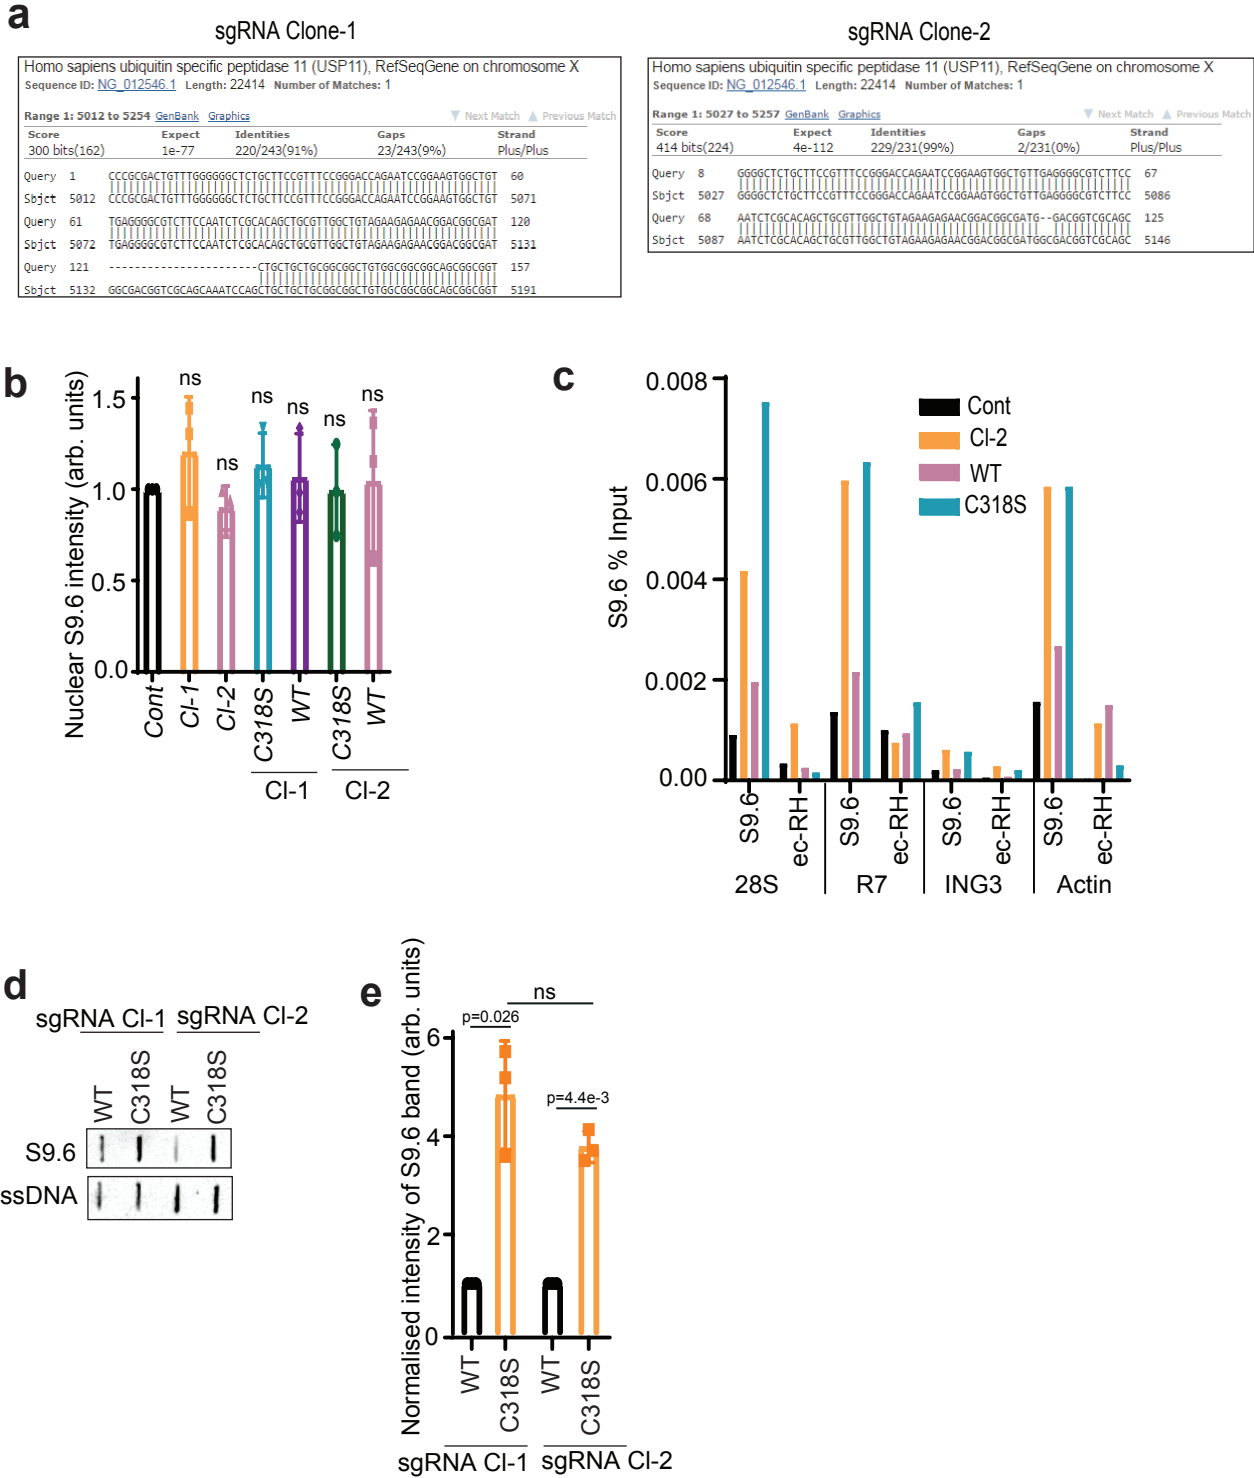

Supplementary Fig. 2 Loss of USP11 triggers R-loop accumulation.

a) Validation of indel mutations in USP11 sgRNA clones. Sanger sequencing reveals a 23-nucleotide deletion in exon 1 of *USP11* gene, Clone-1 (left panel), and a 2-nucleotide deletion in exon 1 of *USP11* gene, Clone-2 (right panel).

b) Corrected total nuclear fluorescence related to Fig. 2f was measured using ImageJ and normalised to control cells. Data are the average  $\pm$  SD from 3 biological repeats, each containing at least 100 cells. ns;  $p > 0.05$ , two-sided Student's t-test.

c) Raw data from a representative experiment of DRIP-qPCR related to Fig. 2g. Lysates from Control HEK-293 (Cont), USP11 sgRNA CI-2 (CI-2), USP11-sgRNA CI-2 complemented with WT USP11 (WT) or C318S USP11 (C318S) were subjected to DNA/RNA immunoprecipitation (DRIP) using S9.6 antibodies. Quantitative PCR was conducted using primers targeting nucleolar (28S and R7) and nuclear (*ING3* and *actin*) loci. *In vitro*, on-bead ec-RNase H (ec-RH) treatment served as a signal validation control.

d) Lysates from USP11 knockout cells complemented with either wild-type (WT) or catalytically inactive USP11 C318S (C318S) were subjected to a slot blot analysis using S9.6 and  $\alpha$ -ssDNA antibodies. A representative experiment of 3 biological repeats is shown. ssDNA signal was used as a loading control.

e) S9.6 band intensities from (d) were normalised to ssDNA and presented as fold enrichment compared to control WT cells. Data are the average of 3 biological repeats and presented as mean  $\pm$  SD. ns;  $p > 0.05$ , two-sided Student's t-test.

# Supplementary Figure 3

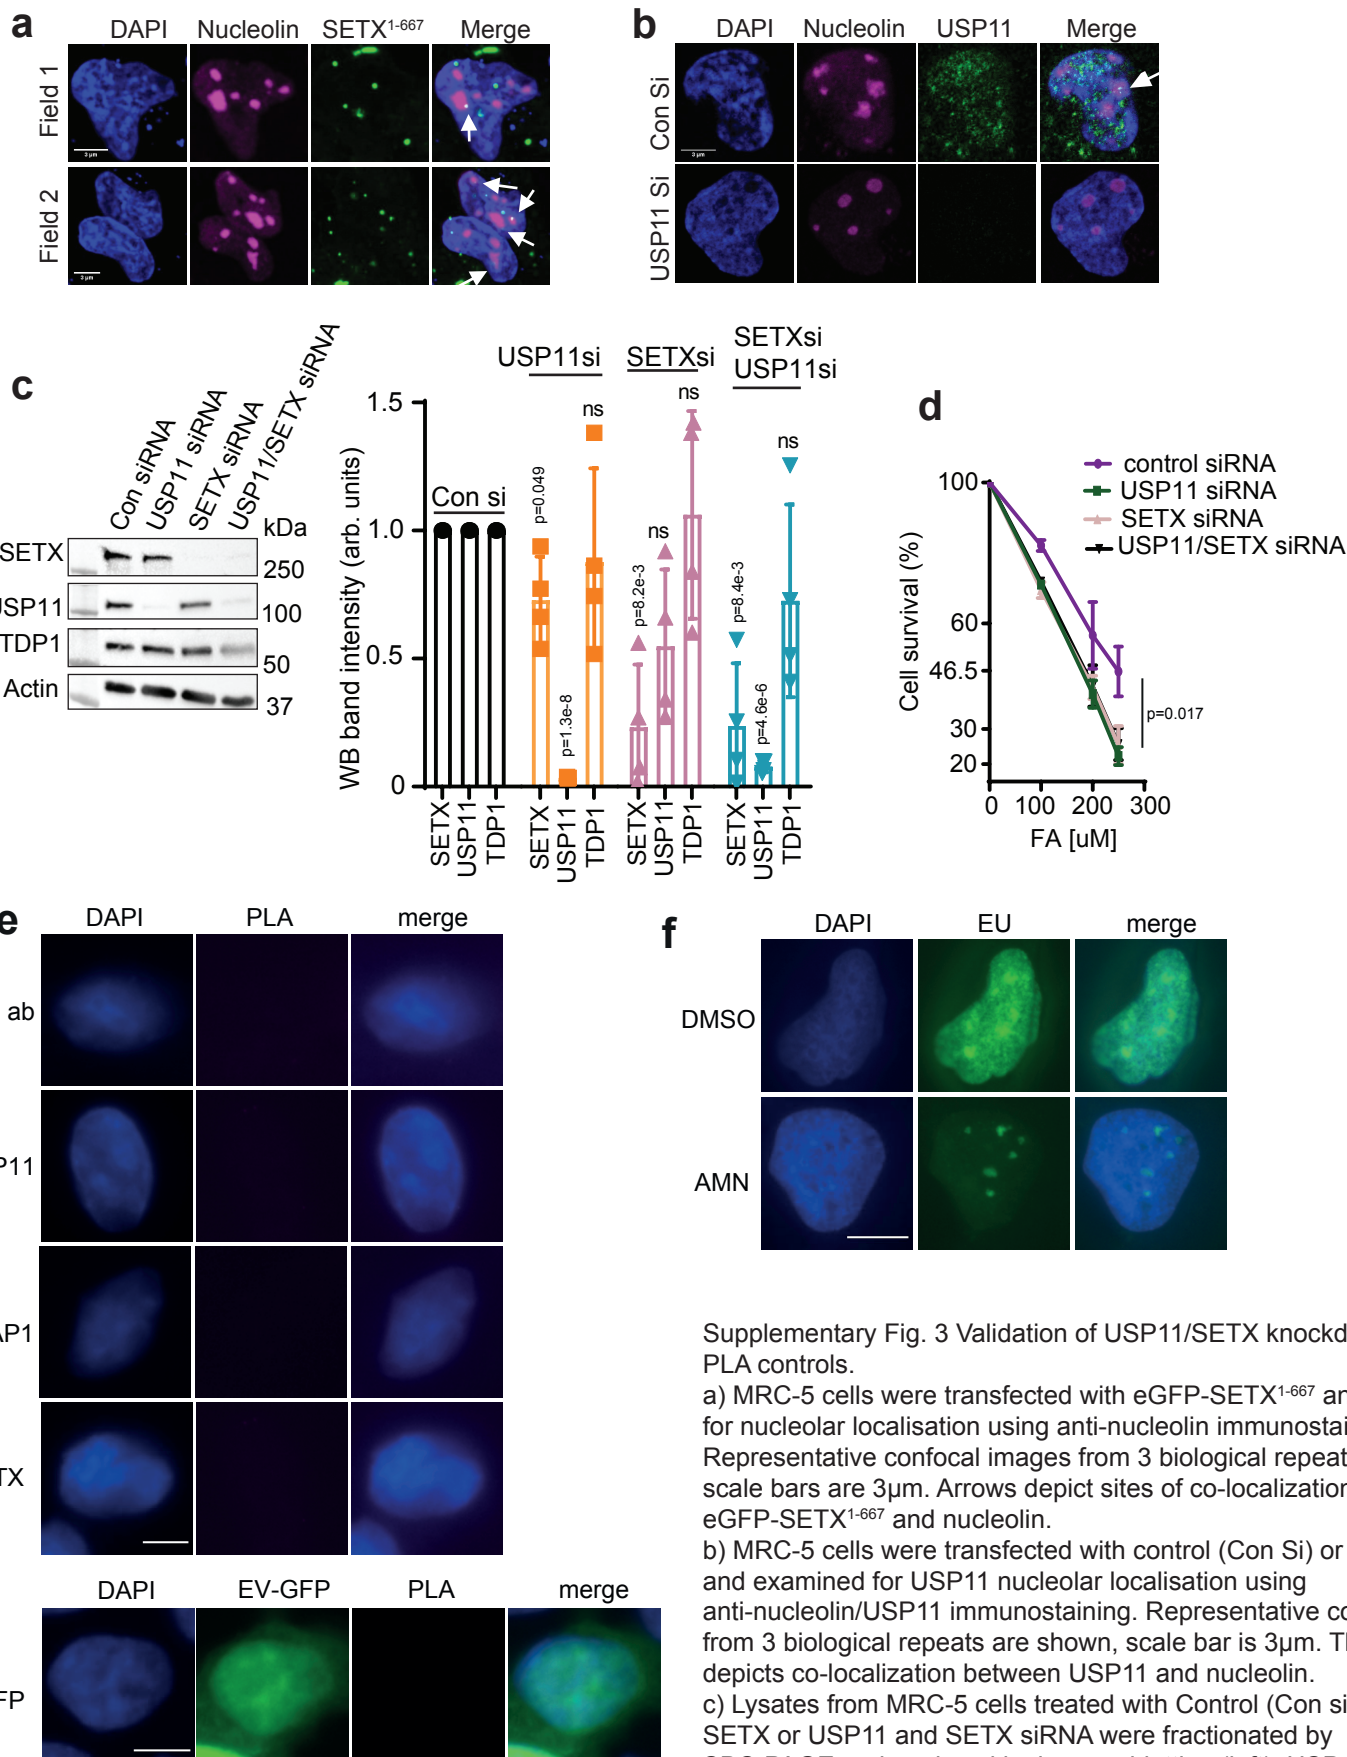

Supplementary Fig. 3 Validation of USP11/SETX knockdown and PLA controls.

a) MRC-5 cells were transfected with eGFP-SETX<sup>1-667</sup> and examined for nucleolar localisation using anti-nucleolin immunostaining. Representative confocal images from 3 biological repeats are shown, scale bars are 3µm. Arrows depict sites of co-localization between eGFP-SETX<sup>1-667</sup> and nucleolin.

b) MRC-5 cells were transfected with control (Con Si) or USP11 siRNA and examined for USP11 nucleolar localisation using anti-nucleolin/USP11 immunostaining. Representative confocal images from 3 biological repeats are shown, scale bar is 3µm. The arrow depicts co-localization between USP11 and nucleolin.

c) Lysates from MRC-5 cells treated with Control (Con si), USP11, SETX or USP11 and SETX siRNA were fractionated by SDS-PAGE and analysed by immunoblotting (left). USP11, SETX and TDP1 band intensities were normalised to Actin and presented as fold reduction compared to controls (right). Data are the average of 4 biological repeats and presented as mean ± SD. ns p>0.05, two-sided Student's t-test.

d) MRC-5 cells treated with Control, USP11, SETX or USP11 and SETX siRNA were incubated with the indicated doses of formaldehyde (FA) for 3 hours and left to grow for 7 days. The surviving colonies were counted and % survival calculated relative to mock-treated cells. Data are the mean ± SD from 3 biological repeats. Two-sided Student's t-test

e) Control experiments for proximity ligation assays (PLA) in MRC-5 cells. No antibodies (no ab) or single antibodies as indicated were used. For GFP PLA, MRC-5 cells were transfected with empty vector-eGFP (EV-GFP) first. The scale bar is equal to 10 µm. Images are representative of 3 biological repeats.

f) Validation of alpha-amanitin (AMN) treatment. MRC-5 cells were incubated with 50µM AMN or DMSO over-night, which was followed by 5'-ethynyl uridine (EU) incubation for 1h. After incubation, cells were immediately harvested for EU-staining. The scale bar is equal to 10 µm. Images are representative of 3 biological repeats.

## Supplementary Figure 4

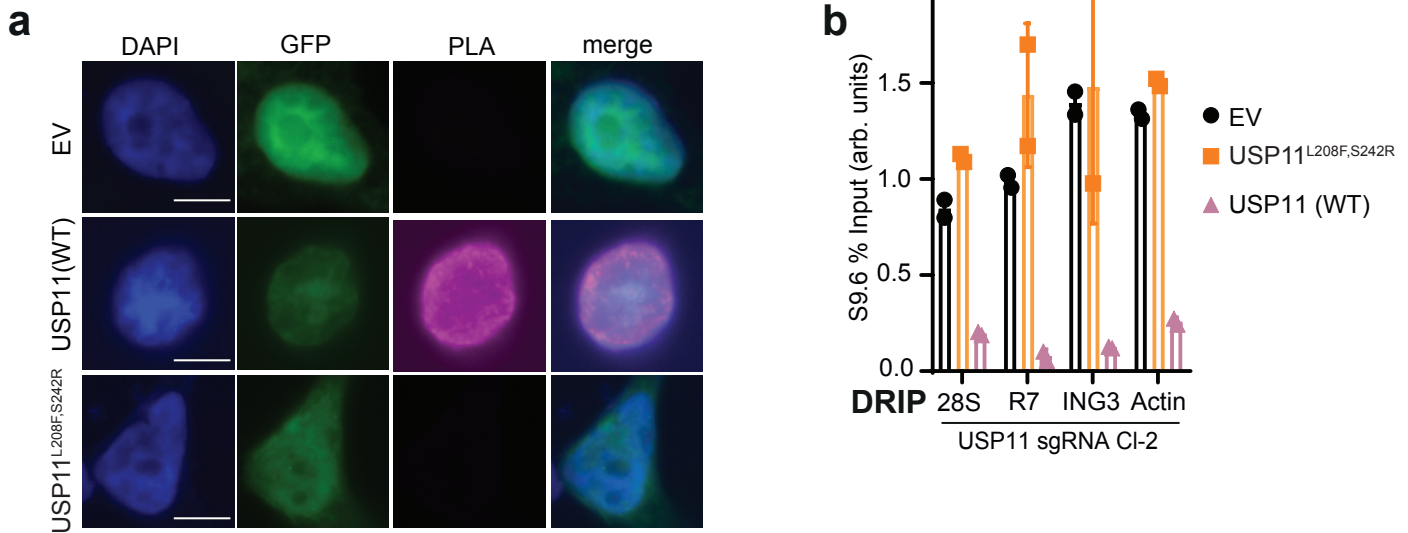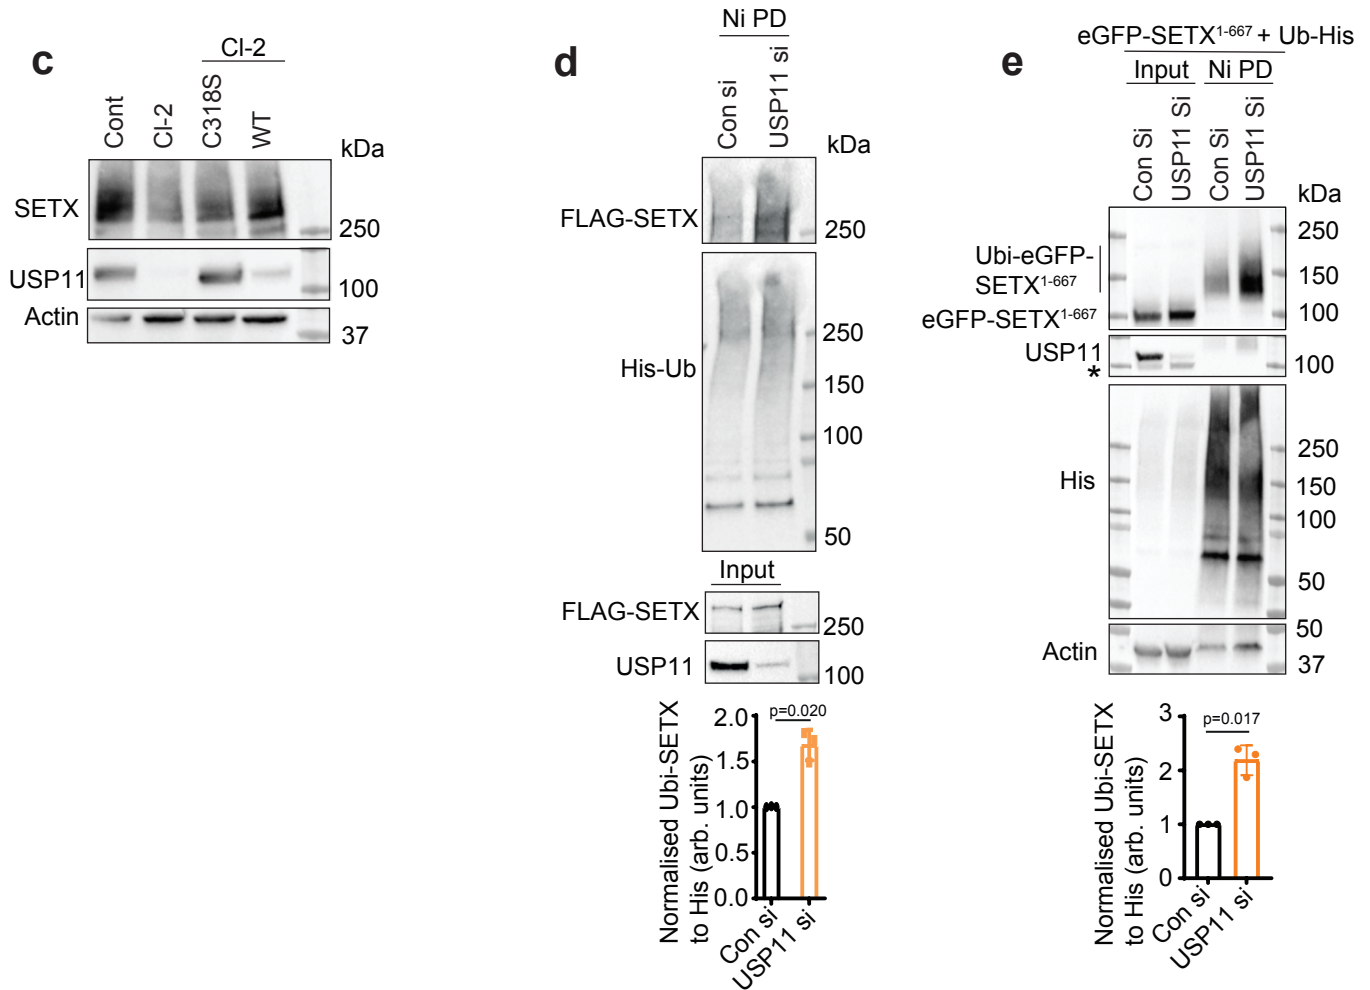

Supplementary Fig.4 USP11<sup>L208F,S242R</sup>:SETX interaction and ubiquitination of SETX.

a) MRC-5 cells were transfected with empty vector-eGFP (EV), GFP-USP11 (WT) or GFP-USP11<sup>L208F,S242R</sup>, and subjected to Proximity Ligation Assay using antibodies against GFP and SETX. Representative images are shown, scale bars are equal to 10 $\mu$ m. Images are representative of 3 biological repeats.

b) Lysates from USP11 sgRNA CI-2 transiently over-expressing empty vector-eGFP (EV), GFP-USP11<sup>L208F,S242R</sup> or GFP-USP11 (WT) were subjected to DNA/RNA immunoprecipitation using S9.6 antibodies. Quantitative PCR was conducted using primers targeting nucleolar (28S and R7) and nuclear (ING3 and actin) loci. The data represent the average  $\pm$  range from 2 biological repeats.

c) Lysates from parental HEK-293 (Cont), USP11-sgRNA CI-2 (CI-2) and USP11-sgRNA CI-2 complemented with WT USP11 (WT) or active site mutant USP11 (C318S) cells were fractionated by SDS-PAGE and analysed by immunoblotting. Images are representative of 3 biological repeats.

d, e) Control (Con si) and USP11-depleted HEK-293 cells (USP11 si) were transfected with plasmids encoding FLAG-SETX (d) or eGFP-SETX<sup>1-667</sup> (e) and Ub-His, treated with 10  $\mu$ M MG132 overnight (proteasomal inhibitor), lysed and subjected to nickel pull-down under denaturing conditions to purify ubiquitinated proteins. Samples were fractionated by SDS-PAGE and analysed by immunoblotting using anti-GFP, FLAG, USP11, His and actin antibodies. \*denotes a non-specific band. The band intensities of Ubi-SETX were normalised to His-Ub and presented as fold increase of SETX ubiquitination compared to controls. Data are the average  $\pm$  SD from 3 biological repeats. p values calculated using two-sided Student's t-test.

# Supplementary Figure 5

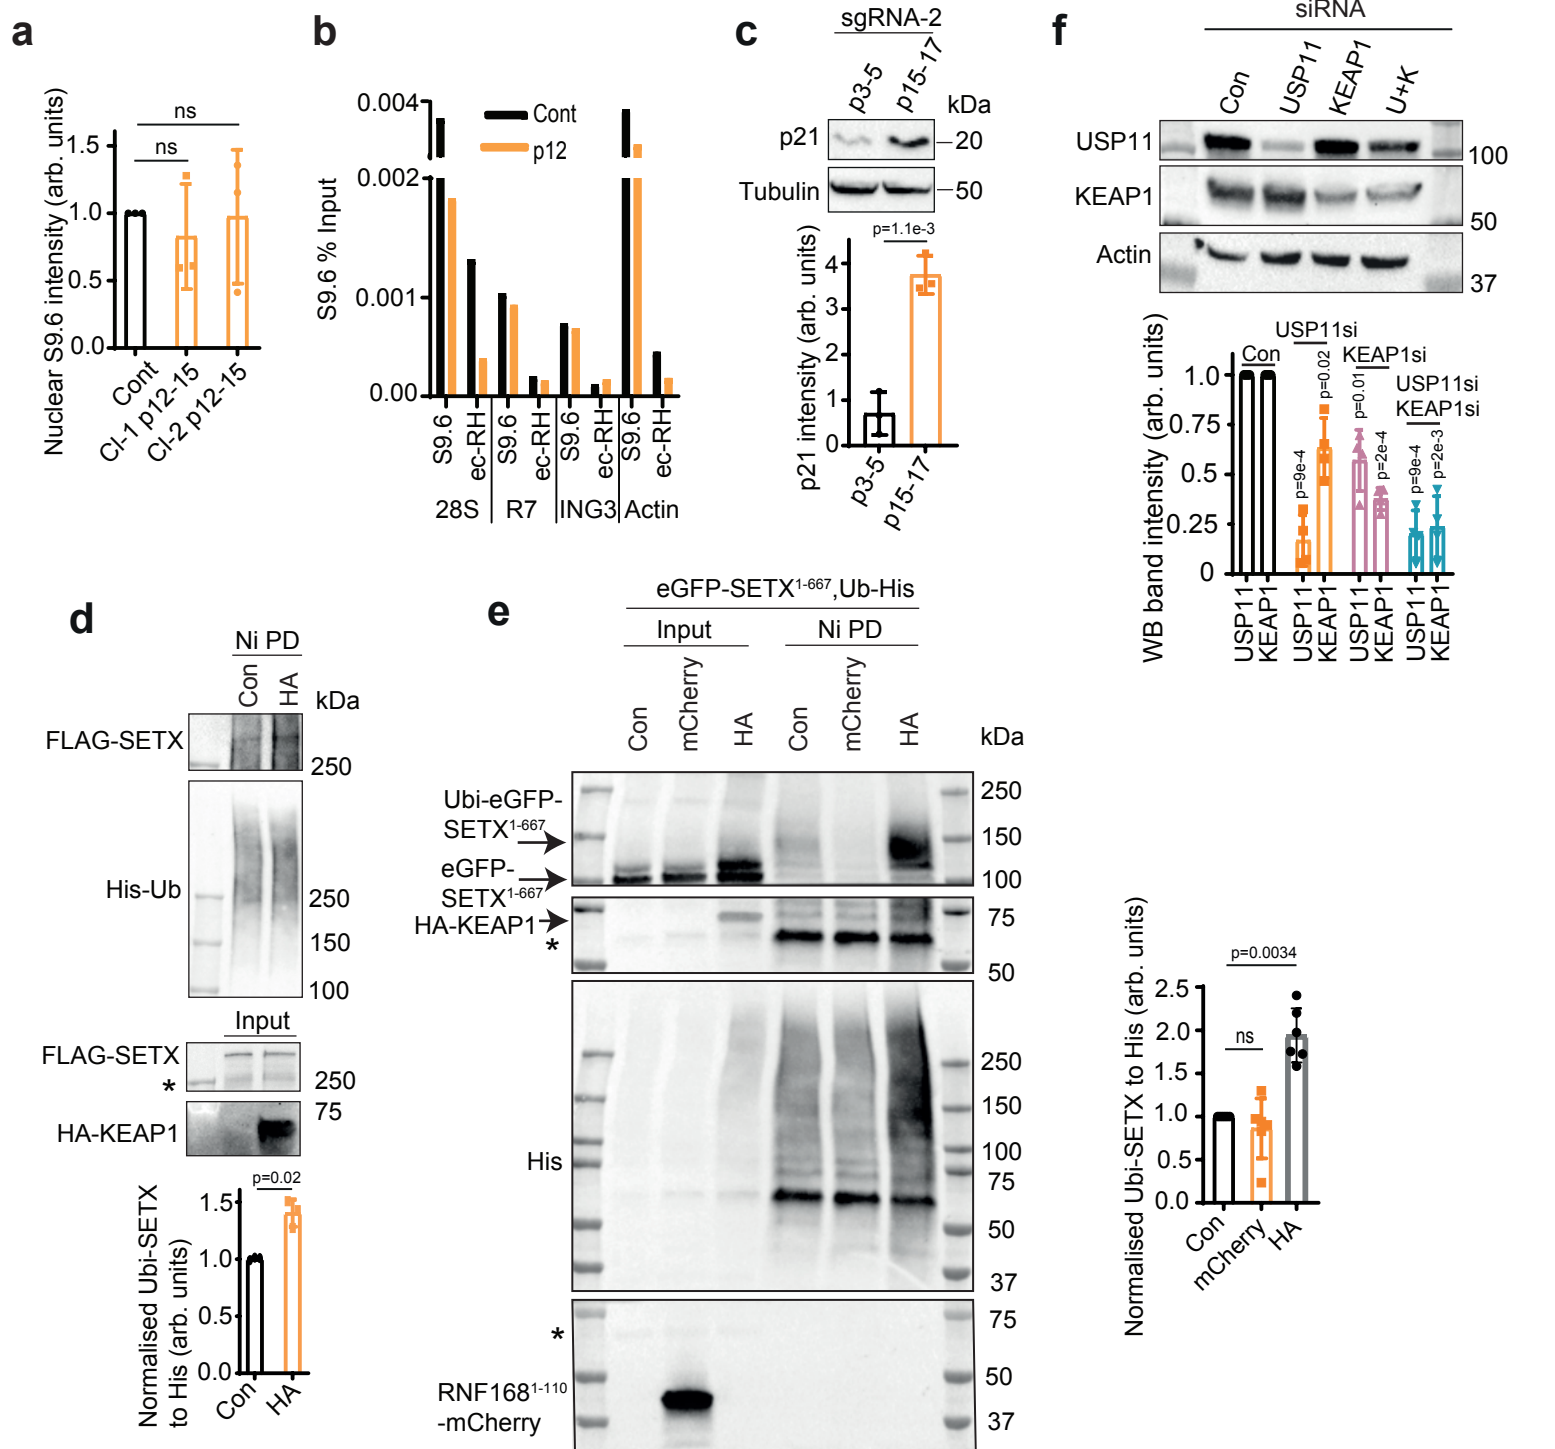

Supplementary Fig. 5. R-loop levels in aged USP11 knockout cells and ubiquitination of SETX.

a) Corrected total nuclear fluorescence of aged USP11 sgRNA CI-1 and 2 (CI-1 p12-15; CI-2 p12-15) related to Fig. 5a was measured using ImageJ and normalised to mock (Cont; HEK-293). Data are the average  $\pm$  SD from 3 biological repeats, each containing at least 100 cells. ns;  $p > 0.05$ , two-sided Student's t-test.

b) Raw data from a representative experiment of DRIP-qPCR related to Fig 5b. Lysates from Control HEK-293 (Cont) and aged USP11 sgRNA CI-2 (p12) were subjected to DNA/RNA immunoprecipitation (DRIP) using S9.6 antibodies. Quantitative PCR was conducted using primers targeting nucleolar (28S and R7) and nuclear (ING3 and actin) loci. *In vitro*, on-bead ec-RNase H (ec-RH) treatment served as a signal validation control.

c) Lysates from young (p3-5) and aged (p15-17) USP11 sgRNA CI-2 were fractionated by SDS-PAGE and analysed by immunoblotting (top panel). p21 band intensities were normalised to tubulin (bottom panel). Data are the average of 3 biological repeats and presented as mean  $\pm$  SD. p values were calculated using two-sided Student's t-test.

d, e) Control (Con), RNF168<sup>1-110</sup>-mCherry (mCherry) and HA-KEAP1 (HA) over-expressing HEK-293 cells were transfected with plasmids encoding Ub-His, FLAG-SETX (e) or eGFP-SETX<sup>1-667</sup> (f), lysed and subjected to nickel pull-down under denaturing conditions to purify ubiquitinated proteins. Samples were fractionated by SDS-PAGE and analysed by immunoblotting using anti-GFP, FLAG, USP11, HA, His and mCherry antibodies. \*denotes a non-specific band. The band intensities of Ubi-SETX were normalised to His-Ub and presented as fold increase of SETX ubiquitination compared to controls. Data are the average  $\pm$  SD from 3 biological repeats. ns;  $p > 0.05$ , two-sided Student's t-test.

f) Lysates from HEK-293 cells treated with scrambled (Con), USP11, KEAP1 or USP11 and KEAP1 (U+K) siRNA were fractionated by SDS-PAGE and analysed by immunoblotting (top panel). USP11 and KEAP1 band intensities were normalised to actin and presented as fold reduction compared to levels in control cells (bottom panel). Data are the average of 4 biological repeats and presented as mean  $\pm$  SD. p values calculated using two-sided Student's t-test.

# Supplementary Figure 6

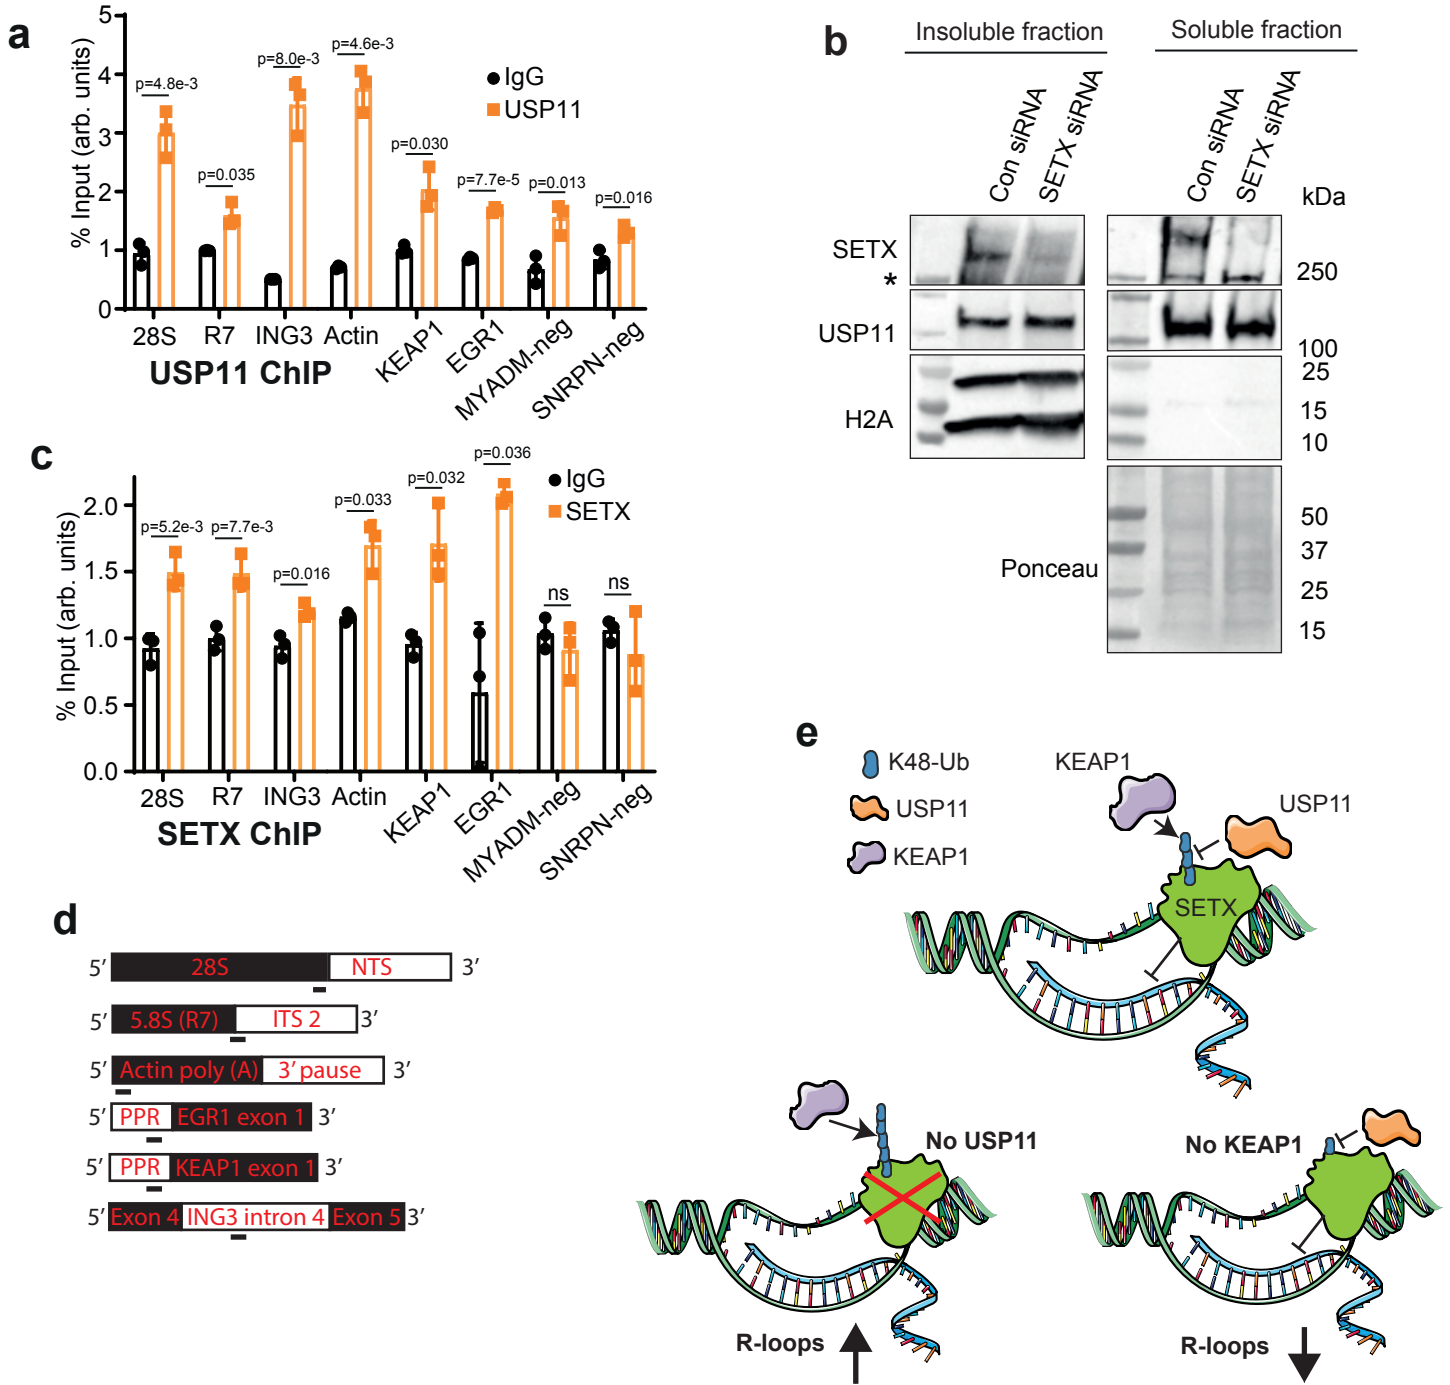

Supplementary Fig. 6. USP11 nuclear fractionation, SETX chromatin binding and a model depicting the role of USP11 and KEAP1. a) HEK-293 cells were subjected to a USP11 ChIP followed by qPCR using primers targeting nucleolar (28S, R7) and nuclear (ING3, Actin, KEAP1, EGR1, SNRPN-neg, MYADM-neg) loci. IgG served as a negative control. Data represent the average  $\pm$  SD from 3 biological repeats. p values calculated using two-sided Student's t-test. b) HEK-293 cells were transfected with Control siRNA or SETX siRNA and subjected to nuclear fractionation assay followed by immunoblotting. Levels of SETX, USP11 and H2A were analysed. H2A served as a loading control specific to insoluble fraction. \* denotes a non-specific band. Images are representative of 3 biological repeats. c) HEK-293 cells were subjected to a SETX ChIP followed by qPCR using primers targeting nucleolar (28S, R7) and nuclear (ING3, Actin, KEAP1, EGR1, SNRPN-neg, MYADM-neg) loci. IgG served as a negative control. Data represent the average  $\pm$  SD from 3 biological repeats. ns;  $p > 0.05$ , two-sided Student's t-test. d) A diagram representing PCR amplicons generated by primers used for ChIP and DRIP-qPCR experiments (Fig. 7). NTS - nontranscribed spacer; ITS - intergenic transcribed spacer. e) KEAP1 and USP11 add and remove K48-Ub chains from SETX respectively. In the absence of USP11, SETX is ubiquitinated and subsequently degraded, which leads to R-loop accumulation. In the absence of KEAP1, SETX is deubiquitinated and thus its protein level is stabilised, which results in R-loop resolution.

Supplementary Table 1. List of primers and DNA sequences used in the study

| Gene      | NCBI Gene ID | Primer name            | Forward Primer (5'-3')                  | Reverse Primer (5'-3')               | Amplicon length | Location                 | Targeted splice variants | Source                                                                                                                                                                                                                                                                         | Comment                        |
|-----------|--------------|------------------------|-----------------------------------------|--------------------------------------|-----------------|--------------------------|--------------------------|--------------------------------------------------------------------------------------------------------------------------------------------------------------------------------------------------------------------------------------------------------------------------------|--------------------------------|
| ACTB      | 60           | Actin $\beta$          | GCT CAG GGC<br>TTC TTG TCC<br>TT        | TCG ATG GGG<br>TAC TTC AGG GT<br>TT  | 121bp           | Exon 3                   | All                      | Li,M., Pokharel,S., Wang,J.T., Xu,X. and Liu,Y. (2015) RECQ5-dependent SUMOylation of DNA topoisomerase I prevents transcription-associated genome instability. <i>Nat. Commun.</i> , 6, 1–13.                                                                                 | Reference gene for RT-qPCR     |
| USP11     | 8237         | USP11                  | TGGAAGGCGA<br>GGATTATGTG<br>C           | ATGACCTTGC GTT<br>CAATGGGT           | 102bp           | Exon 4                   | All                      | Zhou,Z., Luo,A., Shrivastava,I., He,M., Huang,Y., Bahar,I., Liu,Z. and Wan,Y. (2017) Regulation of XIAP Turnover Reveals a Role for USP11 in Promotion of Tumorigenesis. <i>EBioMedicine</i> , 15, 48–61.                                                                      | Target gene                    |
| SETX      | 23064        | SETX                   | CTT CAT CCT<br>CGG ACA TTT<br>GAG       | TTA ATA ATG GCA<br>CCA CGC TTC       | 176bp           | Exon 26                  | All                      | Skourti-Stathaki,K., Proudfoot,N.J. and Gromak,N. (2011) Human senataxin resolves RNA/DNA hybrids formed at transcriptional pause sites to promote Xrn2-dependent termination. <i>Mol. Cell</i> , 42, 794–805.                                                                 | Target gene                    |
| KEAP1     | 9817         | KEAP1 (RT-qPCR)        | TGG CCA AGC<br>AAG AGG AGT<br>TC        | GGC TGA TGA<br>GGG TCA CCA GTT<br>TC | 60bp            | Exon 3                   | All                      | Hussong,M., Börno,S.T., Kerick,M., Wunderlich,A., Franz,A., Sültmann,H., Timmermann,B., Lehrach,H., Hirsch-Kauffmann,M. and Schweiger,M.R. (2014) The bromodomain protein BRD4 regulates the KEAP1/NRF2-dependent oxidative stress response. <i>Cell Death Dis.</i> , 5, 1–11. | Target gene for RT-qPCR        |
| KEAP1     | 9817         | KEAP1 (ChIP/DRIP-qPCR) | GGA AAG<br>GAG CGG<br>CGA TTC           | CAT CCA GCA<br>ACG AAA TCG GG        | 137             | Promoter proximal region | All                      | This study                                                                                                                                                                                                                                                                     | Target gene for ChIP/DRIP-qPCR |
| RNA28S N3 | 10991 0382   | 28S                    | CAG GGG AAT<br>CCG ACT GTT<br>TA        | AT GAC GAG GCA<br>TTT GGC TAC        | 173bp           | ribosomal RNA            | All                      | Johnston,R., D'Costa,Z., Ray,S., Gorski,J., Paul Harkin,D., Mullan,P. and Panov,K.I. (2016) The identification of a novel role for BRCA1 in regulating RNA polymerase I transcription. <i>Oncotarget</i> , 7, 68097–68110.                                                     | Target gene                    |
| RNA5-8SN3 | 10991 0381   | R7                     | GAC ACT TCG<br>AAC GCA CTT<br>G         | CTC AGA CAG<br>GCG TAG CCC CG        | 55bp            | ribosomal RNA            | All                      | Shen,W., Sun,H., De Hoyos,C.L., Bailey,J.K., Liang,X.H. and Crooke,S.T. (2017) Dynamic nucleoplasmic and nucleolar localization of mammalian RNase H1 in response to RNAP I transcriptional R-loops. <i>Nucleic Acids Res.</i> , 45, 10672–10692.                              | Target gene                    |
| ING3      | 54556        | ING3                   | TTT TTC TTC<br>TCT AAC TAC<br>CCT CCC C | GTG CCC TAA TCT<br>GAA TGA CTA CA    | 99bp            | intron 4                 | All                      | Halász,L., Karányi,Z., Boros-oláh,B., Kuik-rózsa,T., Sipos,É., Nagy,É., Mosolygó-I,Á., Mázló,A., Rajnavölgyi,É., Halmos,G., et al. (2017) RNA-DNA hybrid (R-loop) immunoprecipitation mapping: an analytical workflow to evaluate inherent biases. 10.1101/gr.219394.116.6.    | Target gene                    |

|        |       |           |                                  |                               |       |                                |     |                                                                                                                                                                                                                                                                                                            |             |
|--------|-------|-----------|----------------------------------|-------------------------------|-------|--------------------------------|-----|------------------------------------------------------------------------------------------------------------------------------------------------------------------------------------------------------------------------------------------------------------------------------------------------------------|-------------|
| ACTB   | 60    | Actin     | TTA CCC AGA<br>GTG CAG GTG<br>TG | CCC CAA TAA GCA<br>GGA ACA GA | 104bp | 5' of 3'<br>pause site         | All | Skourti-Stathaki,K., Proudfoot,N.J. and Gromak,N. (2011) Human senataxin resolves RNA/DNA hybrids formed at transcriptional pause sites to promote Xrn2-dependent termination. <i>Mol. Cell</i> , 42, 794–805.                                                                                             | Target gene |
| EGR1   | 1958  | EGR1      | CATAGGGAAG<br>CCCCTCTTTC         | CTTGTGGTGAGGG<br>GTCACCT      | 90bp  | Promoter<br>proximal<br>region | All | Ginno,P., Lott,P., Christensen,H., Korf,I. and Chédin,F. (2012) R-loop formation is a distinctive characteristic of unmethylated human CpG island promoters. <i>Mol. Cell</i> , 45, 814–825.                                                                                                               | Target gene |
| FRA3B  | 2272  | FRA3B     | TTAGCCTACTT<br>CAGGGTTTCT        | TGGAGAGGTTACT<br>ACTGGCA      | 148bp | Common<br>Fragile<br>Site      | All | Björkman, A., Johansen, S.L., Lin, L., Schertzer, M., Kanellis, D.C., Katsori, A.-M., Christensen, S.T., Luo, Y., Andersen, J.S., Elsässer, S.J., et al. (2020). Human RTEL1 associates with Poldip3 to facilitate responses to replication stress and R-loop resolution. <i>Genes Dev.</i> 34, 1065–1074. | Target gene |
| FRA16D | 2463  | FRA16     | CAGCCAGCAC<br>TCCTTCTCAA         | CTCTGTGGAGAAG<br>CCAAGCA      | 149bp | Common<br>Fragile<br>Site      | All | Björkman, A., Johansen, S.L., Lin, L., Schertzer, M., Kanellis, D.C., Katsori, A.-M., Christensen, S.T., Luo, Y., Andersen, J.S., Elsässer, S.J., et al. (2020). Human RTEL1 associates with Poldip3 to facilitate responses to replication stress and R-loop resolution. <i>Genes Dev.</i> 34, 1065–1074. | Target gene |
| SNRPN  | 6638  | SNRPN-neg | GCCAAATGAG<br>TGAGGATGGT         | TCCTCTCTGCCTG<br>ACTCCAT      | 102bp | 5' UTR                         | All | Ginno,P., Lott,P., Christensen,H., Korf,I. and Chédin,F. (2012) R-loop formation is a distinctive characteristic of unmethylated human CpG island promoters. <i>Mol. Cell</i> , 45, 814–825.                                                                                                               | Target gene |
| MYADM  | 91663 | MYADM-neg | TGCATCTACAT<br>CCGAAAAG          | AGAGTGGACGCT<br>GCAGAAAT      | 146bp | 5' UTR                         | All | Ginno,P., Lott,P., Christensen,H., Korf,I. and Chédin,F. (2012) R-loop formation is a distinctive characteristic of unmethylated human CpG island promoters. <i>Mol. Cell</i> , 45, 814–825.                                                                                                               | Target gene |

#### SDM & Cloning primers

| Name of the primer | Forward Primer (5'-3')                             | Reverse Primer (5'-3')                                          | Method         | Purpose                                             | Template plasmid |
|--------------------|----------------------------------------------------|-----------------------------------------------------------------|----------------|-----------------------------------------------------|------------------|
| USP11 (C318S)      | CAA TCT GGG CAA CAC GAG CTT CAT GAA CTC GGC        | GCC GAG TTC ATG AAG CTC GTG TTG CCC AGA TTG                     | SDM            | Generation of FLAG-HA-USP11(C318S)                  | FLAG-HA-USP11    |
| SETX(1-667)        | ACA AGT CCG GAC TCA GAT CTA TGA GCA CAT GTT GTT GG | 5'CAC TCA CTG GTA CTG GCC CTT TAG TCA CCT TCT ATA GTG TTA TC    | Gibson Cloning | To amplify SETX(1-667) for eGFP-SETX(1-667)         | pCMV6-XL-SETX    |
| peGFP-C1           | AGG GCC AGT ACC AGT GAG                            | AGA TCT GAG TCC GGA CTT G                                       | Gibson Cloning | To amplify peGFP-C1 for eGFP-SETX(1-667)            | peGFP-C1         |
| USP11 (WT)         | CAA GTC CGG ACT CAG ATC TAT GGC AGT AGC CCC GCG A  | ACT CAC TGG TAC TGG CCC TTC AAT TAA CAT CCA TGA ACT CAG AGC TGG | Gibson Cloning | To amplify USP11 for eGFP-USP11(WT)                 | FLAG-HA-USP11    |
| peGFP-C1           | AGG GCC AGT ACC AGT GAG                            | AGA TCT GAG TCC GGA CTT G                                       | Gibson Cloning | To amplify peGFP-C1 for eGFP-USP11 (WT)             | peGFP-C1         |
| RNF168(1-110)      | TCAGATCTCGAGCTCAAGCTATGGCTCTACC CAAAGAC            | ATGTCGACTGCAGAATTCGAAGGTTTACTGAGC AGACG                         | Gibson Cloning | To amplify RNF168(1-110) for pRNF168(1-110)-mCherry | peGFP-RNF168     |



|               |                                                  |                                                  |                |                                                   |                      |
|---------------|--------------------------------------------------|--------------------------------------------------|----------------|---------------------------------------------------|----------------------|
| pmCherry-N1   | TCGAATTCTGCAGTCGAC                               | AGCTTGAGCTCGAGATCTG                              | Gibson Cloning | To amplify pmCherry-N1 for pRNF168(1-110)-mCherry | pmCherry-N1          |
| USP11 (L208F) | CCAAGAACTCAGAAGGCTCTTTCGATAGGTT<br>GTATGACACACAC | GTGTGTGTCATACAACCTATCGAAAGAGCCTTC<br>TGAGTTCTTGG | SDM            | Generation of FLAG-HA-USP11(L208F)                | FLAG-HA-USP11        |
| USP11 (S242R) | GGCACTTGGCCCAGAGCACAGCTGCATGTC                   | GACATGCAGCTGTGCTCTGGGCCAAGTGCC                   | SDM            | Generation of FLAG-HA-USP11(L208F, S242R)         | FLAG-HA-USP11(L208F) |

Supplementary Table 2. List of siRNA and gRNA used in this study

| siRNA      | siRNA Sequence                  |
|------------|---------------------------------|
| siControl  | 5' UAA UGU AUU GGA ACG GAU 3'   |
| siUSP11 #1 | 5' GCG CAC AGC UGC AUG UCA U 3' |
| siUSP11 #2 | 5' GAG AAG CAC UGG UAU AAG C 3' |
| siUSP11 #3 | 5' GGA CCG UGA UGA UAU CUU C 3' |
| siUSP11 #4 | 5' GAA GAA GCG UUA CUA UGA C 3' |
| siSETX #1  | 5' GCA CGU CAG UCA UGC GUA A 3' |
| siSETX #2  | 5' GCA AUA AGC UCA UCC UAG U 3' |
| siSETX #3  | 5' GCU CAA CUC UCC AAA UAG A 3' |
| siSETX #4  | 5' UAG CAC AGG UUG UUA AUC A 3' |
| siKEAP1    | 5' CAG CAG AAC UGU ACC UGU U 3' |

| gRNA                       | gRNA Sequence                           |
|----------------------------|-----------------------------------------|
| USP11_Exon1 top strand     | 5' CAC CGA GAA CGG ACG GCG ATG GCG A 3' |
| USP11_Exon 1 bottom strand | 5' AAA CTC GCC ATC GCC GTC CGT TCT C 3' |

Supplementary Table 3. List of antibodies used in this study

| Antibody                                       | Dilution / Quantity | Purpose   | Source               | Identifier        |
|------------------------------------------------|---------------------|-----------|----------------------|-------------------|
| TDP1                                           | 1:1000              | IB        | Abcam                | ab4166            |
| Beta-actin                                     | 1:2000              | IB        | Sungene Biotech      | KM9001            |
| S9.6                                           | 1:500               | IF        | Kerafast             | ENH001            |
|                                                | 20 or 28 µg         | DRIP      |                      |                   |
| USP11                                          | 1:1000              | PLA       | Bethyl               | A301-613A         |
|                                                | 1:2000              | IB/IF     |                      |                   |
|                                                | 2 µg                | ChIP      |                      |                   |
| K48 ubiquitin                                  | 1:1000              | IB        | Abcam                | ab140601          |
| GFP                                            | 1:1000              | PLA       | Abcam                | ab290             |
|                                                | 1:2000              | IB/IF     |                      |                   |
| SETX                                           | 1:200               | PLA       | Abnova               | 2579-2676         |
|                                                | 5 µg                | ChIP      | Bethyl               | A301-104A         |
|                                                | 1:1000              | IB        |                      |                   |
| His                                            | 1:1000              | IB        | Abcam                | ab18184           |
| HA                                             | 1:1000              | IB        | Santa Cruz           | F-7               |
| GAPDH                                          | 1:2000              | IB        | Calbiotem            | CB1001            |
| Beta-tubulin                                   | 1:2000              | IB        | Abcam                | ab7792            |
| RPA-194                                        | 1:1000              | IB        | Santa Cruz           | sc-48385          |
| Cyclin A2                                      | 1:1000              | IB        | Cell Signalling      | #4656             |
| Nucleolin                                      | 1:1000              | IB/IF     | Abcam                | ab136649, ab22758 |
| mCherry                                        | 1:1000              | IB        | Abcam                | ab167453          |
| KEAP1                                          | 1:1000              | WB/PLA    | Abcam                | ab139729          |
| yH2A.X                                         | 2 µg                | ChIP      | EMD Millipore        | 05-636            |
| XPF                                            | 1 µg                | ChIP      | Abcam                | ab76948           |
| p21                                            | 1:200               | WB        | Invitrogen           | 14-6715-81        |
| RNA Pol II                                     | 1:1000              | IB        | Santa Cruz           | sc-55492          |
| ssDNA                                          | 1:1000              | Slot blot | EMD Millipore        | #MAB3868          |
| Alexa Fluor 555<br>goat anti-rabbit IgG        | 1:500               | IF        | Thermo Fisher        | A21428            |
| Alexa Fluor 594<br>goat anti-rabbit IgG        | 1:500               | IF        | Thermo Fisher        | A110012           |
| Alexa Fluor 594<br>goat anti-mouse IgG         | 1:500               | IF        | Thermo Fisher        | A11005            |
| Alexa Fluor 488<br>goat anti-rabbit IgG        | 1:1000              | IF        | Thermo Fisher        | A11008            |
| Rabbit IgG                                     | 2 µg                | IP        | Invitrogen           | 02-6102           |
| Goat Anti-Rabbit<br>IgG (H+L)-HRP<br>Conjugate | 1:4000              | IB        | Bio-Rad Laboratories | 170-6515          |
| Goat Anti-Mouse<br>IgG (H+L)-HRP<br>Conjugate  | 1:4000              | IB        | Bio-Rad Laboratories | 170-6516          |

Supplementary Table 4. List of plasmids used in this study:

| Plasmid                             | Purpose                                             | Reference / Source         |
|-------------------------------------|-----------------------------------------------------|----------------------------|
| HA-KEAP1                            | Transient recombinant protein expression            | Plasmid # 21556 - Addgene  |
| FLAG-HA-USP11                       | Complementation of USP11 sgRNA clones, SDM, cloning | Plasmid # 22566 - Addgene  |
| FLAG-HA-USP11 <sup>C318S</sup>      | Complementation of USP11 sgRNA clones               | This study                 |
| pCMV6-XL-SETX                       | Cloning                                             | Plasmid SC308907 – OriGene |
| peGFP-SETX <sup>1-667</sup>         | Pull-down                                           | This study                 |
| FLAG-SETX                           | Pull-down                                           | Gift from S. Wilson        |
| peGFP-C1                            | Cloning, Pull-down, PLA                             | Clontech                   |
| peGFP-USP11                         | Transient recombinant protein expression, PLA, SDM  | This study                 |
| peGFP-USP11 <sup>L208F, S242R</sup> | Transient recombinant protein expression, PLA       | This study                 |
| RNF168(1-110)-mCherry               | Pull-down                                           | Gift from S.El-Khamisy     |
| Ubiquitin-10xHis                    | Pull-down                                           | Gift from S.El-Khamisy     |
| pSpCas9(BB)-2A-GFP_PX458            | Gene silencing                                      | Plasmid # 48138 - Addgene  |
